# Supplementary material for: Dietary Lactobacillus-Derived Exopolysaccharide Enhances Immune-Checkpoint Blockade Therapy
Source: PubMed Central journal article supplement — Cancer Discov. 2022 Feb 17;12(5):1336–55. doi: 10.1158/2159-8290.CD-21-0929 (PMC9662940; doi:10.1158/2159-8290.cd-21-0929), 2022-02-17
Supplement: cd-21-0929_supplementary_table_suppst1.pdf [file cd-21-0929_supplementary_table_suppst1.pdf]

## Supplementary Table

| <b>Abbreviation</b> | <b>Human cancer types</b>                                        |
|---------------------|------------------------------------------------------------------|
| ACC                 | Adrenocortical carcinoma                                         |
| BLCA                | Bladder urothelial carcinoma                                     |
| BRCA                | Breast invasive carcinoma                                        |
| CESC                | Cervical squamous cell carcinoma and endocervical adenocarcinoma |
| CHOL                | Cholangiocarcinoma                                               |
| COAD                | Colon adenocarcinoma                                             |
| CRAD                | Colorectal adenocarcinoma                                        |
| DLBC                | Lymphoid neoplasm diffuse large B-cell lymphoma                  |
| ESCA                | Esophageal carcinoma                                             |
| GBM                 | Glioblastoma multiforme                                          |
| HNSC                | Head and neck squamous cell carcinoma                            |
| KICH                | Kidney chromophobe                                               |
| KIRC                | Kidney renal clear cell carcinoma                                |
| KIRP                | Kidney renal papillary cell carcinoma                            |
| LAML                | Acute myeloid leukemia                                           |
| LGG                 | Brain lower grade glioma                                         |
| LIHC                | Liver hepatocellular carcinoma                                   |
| LUAD                | Lung adenocarcinoma                                              |
| LUSC                | Lung squamous cell carcinoma                                     |
| NSCLC               | Non-small cell lung carcinoma                                    |
| OV                  | Ovarian serous cystadenocarcinoma                                |
| PAAD                | Pancreatic adenocarcinoma                                        |
| PCPG                | Pheochromocytoma and paraganglioma                               |
| PRAD                | Prostate adenocarcinoma                                          |
| READ                | Rectum adenocarcinoma                                            |
| SARC                | Sarcoma                                                          |
| SKCM                | Skin cutaneous melanoma                                          |
| STAD                | Stomach adenocarcinoma                                           |
| TGCT                | Testicular germ cell tumor                                       |
| THCA                | Thyroid carcinoma                                                |
| THYM                | Thymoma                                                          |
| UCEC                | Uterine corpus endometrial carcinoma                             |
| UCS                 | Uterine carcinosarcoma                                           |
